# Supplementary material for: 23.免疫溶菌による大腸菌菌体成分の変化について(第7回 補体シンポジウム)
Source: MDPI journal article supplement (doi:10.3390/genes13101764), 1971-09-30
Supplement: s1 [file s1]

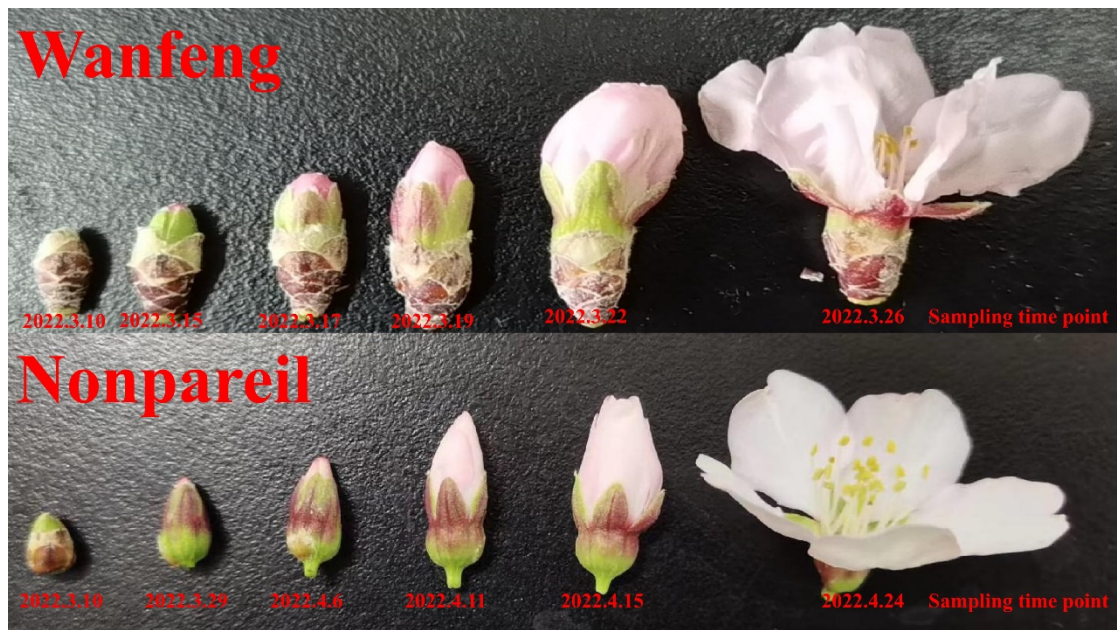

**Figure S1 Six flowering periods of 'Wanfeng' and 'Nonpareil' almonds**

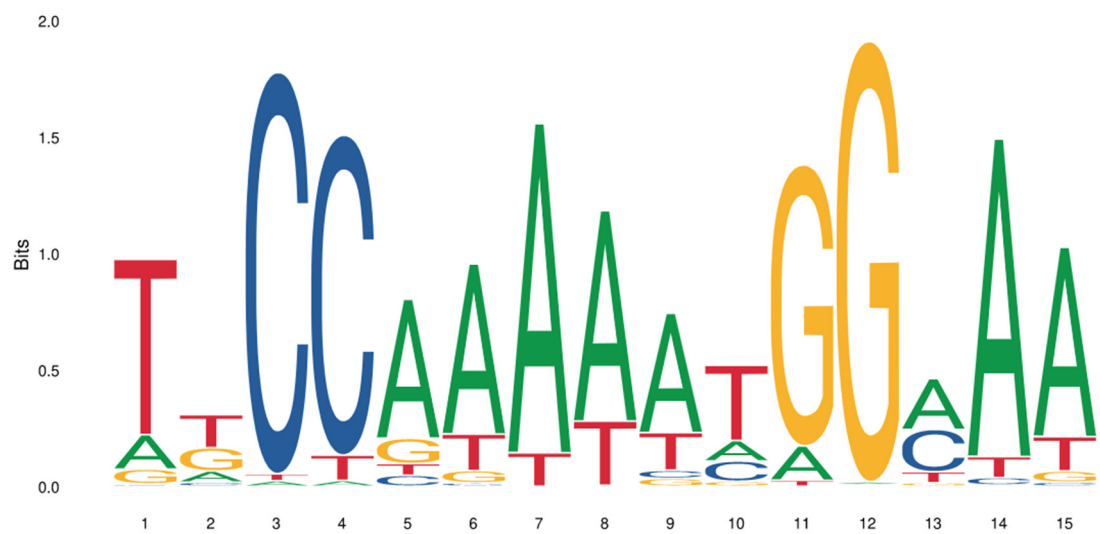

**Figure. S2 The consensus motif of the MIKC DNA binding site from the JASPA CORE database**
